# Supplementary material for: Calorimetric evaluation indicates that lignin conversion to advanced biofuels is vital to improving energy yields
Source: Royal Society of Chemistry journal article supplement (doi:10.1039/c5ra01503k), 2015-01-01
Supplement: c5ra01503k1.pdf [file c5ra01503k1.pdf]

1

## Supplementary Data

2 Figure S1. (a) IKA Bomb Calorimeter, (b) Pelletizer for solid samples, (c) Pellets of solid samples, and (d)  
3 Capsule Aid for liquid samples

4 Table S1. Hydraulic Force required to pelletize relevant solids and liquids and their calorimetry

5

6  
7  
8

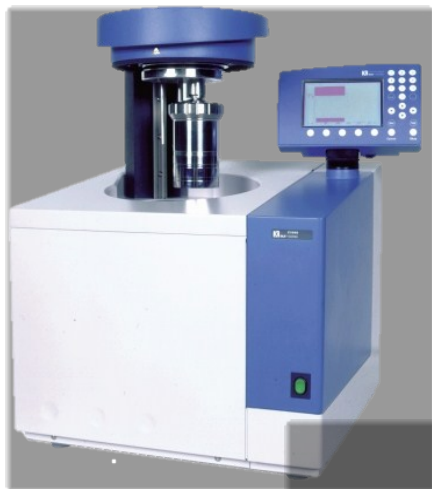

(a)

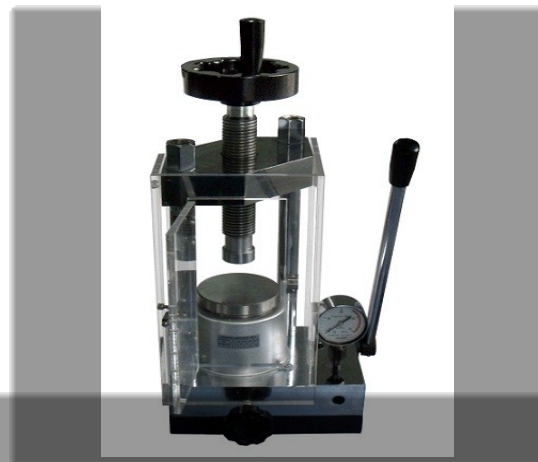

(b)

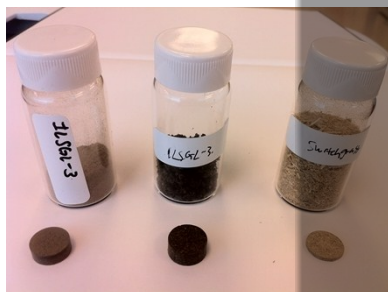

(c)

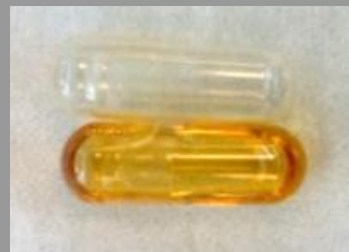

(d)

Figure S1. (a) IKA Bomb Calorimeter, (b) Pelletizer for solid samples, (c) Pellets of solid samples, (d) Capsule Aid for liquid samples

9  
10  
11  
12  
13  
14  
15  
16

17

18 Table S1. Hydraulic Force required to pelletize solid and encapsulation of liquid samples along with  
19 heating values

| Samples                   | Form of material                  | Hydraulic Force*<br>for sample<br>preparation,<br>MPa | Mass<br>Density of<br>pellets,<br>(kg/m <sup>3</sup> ) | Mean High<br>Heating Value,<br>(MJ/kg) | Coefficient<br>of variation,<br>(%) |
|---------------------------|-----------------------------------|-------------------------------------------------------|--------------------------------------------------------|----------------------------------------|-------------------------------------|
| Eucalyptus                | Solid as<br>Chips                 | 16.0                                                  | 279.2                                                  | 18.6                                   | 0.17                                |
| Pretreated<br>Eucalyptus  | Solid as<br>Particles             | 13.0                                                  | 304.8                                                  | 18.9                                   | 0.65                                |
| Glucose                   | Solid as<br>Powder                | 10.0                                                  | 336.2                                                  | 15.5                                   | 0.09                                |
| Ethanol                   | Liquid that is<br>Evaporative     | Encapsulated in<br>Polyethylene                       | n.a.                                                   | 29.2                                   | 1.33                                |
| [C <sub>2</sub> mim][OAc] | Liquid that is<br>non-evaporative | Encapsulated in<br>Polyethylene                       | n.a.                                                   | 23.1                                   | 0.50                                |

20 \*Note: Pelleting force is the observed gauge value
